# Supplementary material for: Transcriptional profiles of drought-responsive genes in modulating transcription signal transduction, and biochemical pathways in tomato
Source: PubMed Central journal article supplement — J Exp Bot. 2010 Jul 19;61(13):3563–75. doi: 10.1093/jxb/erq167 (PMC2921197; doi:10.1093/jxb/erq167), 2010-07-19
Supplement: erq167_1.pdf [file erq167_1.pdf]

Transcriptional profiles of drought-responsive genes in modulating transcription, signal transduction and biochemical pathways in tomato

Pengjuan Gong, Junhong Zhang, Hanxia Li, Changxian Yang, Chanjuan Zhang, Xiaohui Zhang, Khurram Ziaf, Yuyang Zhang, Taotao Wang, Zhangjun Fei and Zhibiao Ye

Supplementary materials

Table S1: Primer information of genes for the RT-PCR analysis

| Accession No. | Primer set                 |                           |
|---------------|----------------------------|---------------------------|
|               | Forward primer (5'-3')     | Reverse primer (5'-3')    |
| SGN-U213363   | ATGGCTATTTACAAAGTTGCTCTCC  | AAGTAACACAAGCCGTGGTAAAGGT |
| SGN-U231627   | CATGGAGAGTATATATGACAGTGCC  | TTTAAAACTCGCAATCCACCTCTG  |
| SGN-U214777   | AGCTACACCACCACTTAAAGTTCTC  | ACCAACCAAAAACAAAAAAGGAACC |
| SGN-U213276   | TCCGACACAGCGCATTCCGCCAAAG  | TTTCTTTAGCCGACTCCATCATTTT |
| SGN-U219218   | CCAAAAGCTATGTATAACACAAGAA  | CAGAGAAAGGGAAAGAGCTTAATAT |
| SGN-U227655   | GTCTCATTTGTATGGCTGCTTATCA  | TACTCATGGATAACCCCAGAGACTA |
| SGN-U218605   | ATGGATTGTGGATTCAATTATGAAT  | ATAATACCTTGTTCCTGCTCTTGGC |
| SGN-U223525   | AACGAAAGTTGATCGATAACAAGTAA | AAGGATACTATATGAACAAACACCC |
| X14449        | TTGCTTGCTTTCACCCTTGG       | TTGGCACCAGTTGGGTCCTT      |

Table S2: Seedling survival rates of ILs, M82 and *S. pennellii* under drought stress treatment at different seasons in 2006

| Gnotype name        | Survival rate (%) |       |       |
|---------------------|-------------------|-------|-------|
|                     | May               | Sep   | Nov   |
| IL2-5               | 70.00             | 80.00 | 73.33 |
| IL9-1               | 73.33             | 80.00 | 80.00 |
| IL11-1              | 50.00             | 66.67 | 63.33 |
| IL8-1               | 63.33             | 56.67 | 56.67 |
| IL6-3               | 53.33             | 63.33 | 56.67 |
| IL1-4               | 50.00             | 53.33 | 53.33 |
| IL3-2               | 43.33             | 50.00 | 46.67 |
| M82                 | 13.33             | 6.67  | 16.67 |
| <i>S. pennellii</i> | 100.00            | 93.33 | 90.00 |

Table S3: Leaf damage rates of two selected ILs, M82 and *S. pennellii* under different drought stresses.

Data are shown as means  $\pm$  standard error of triplicate samples.

Mild stress: tomato seedlings immersed in 2% (w/v) PEG nutrient solution 12h;

Moderate stress: tomato seedlings immersed in 4% (w/v) PEG nutrient solution 12h;

Severe stress: tomato seedlings immersed in 6% (w/v) PEG nutrient solution 12h.

| Genotype name       | Mild stress       | Moderate stress   | Severe stress     |
|---------------------|-------------------|-------------------|-------------------|
| <i>S. pennellii</i> | 15.36 $\pm$ 0.19* | 16.89 $\pm$ 0.37* | 17.66 $\pm$ 0.88* |
| M82                 | 19.29 $\pm$ 0.54  | 23.76 $\pm$ 0.68  | 24.50 $\pm$ 0.17  |
| IL9-1               | 16.37 $\pm$ 0.21* | 16.73 $\pm$ 0.12* | 22.37 $\pm$ 0.11* |
| IL2-5               | 16.05 $\pm$ 0.52* | 16.55 $\pm$ 0.65* | 17.77 $\pm$ 0.72* |

\* Significantly different from M82 at  $p < 0.01$ .

Table S5: Functional classification of drought responsive genes

The percentage of genes involved in each biological process was shown in parenthesis.

| Biological Process                                   | Number of differently expressed genes |              |              |
|------------------------------------------------------|---------------------------------------|--------------|--------------|
|                                                      | M82                                   | IL2-5        | IL9-1        |
| Cellular process                                     | 547 (38.52%)                          | 379 (38.01%) | 315 (37.63%) |
| Metabolic process                                    | 456 (32.11%)                          | 287 (28.79%) | 229 (27.36%) |
| Response to stress                                   | 403 (28.38%)                          | 302 (30.29%) | 267 (31.90%) |
| Biosynthetic process                                 | 312 (21.97%)                          | 223 (22.37%) | 194 (23.18%) |
| Response to abiotic stimulus                         | 249 (17.54%)                          | 172 (17.25%) | 155 (18.52%) |
| Transport                                            | 201 (14.15%)                          | 150 (15.05%) | 118 (14.10%) |
| Response to endogenous stimulus                      | 193 (13.59%)                          | 142 (14.24%) | 117 (13.98%) |
| Signal transduction                                  | 187 (13.17%)                          | 127 (12.74%) | 108 (12.90%) |
| Transcription                                        | 182 (12.82%)                          | 149 (14.94%) | 126 (15.05%) |
| Cellular amino acid and derivative metabolic process | 169 (11.90%)                          | 119 (11.94%) | 98 (11.71%)  |
| Lipid metabolic process                              | 169 (11.90%)                          | 117 (11.74%) | 105 (12.54%) |
| Protein modification process                         | 166 (11.69%)                          | 113 (11.33%) | 84 (10.04%)  |
| Catabolic process                                    | 163 (11.48%)                          | 89 (8.93%)   | 80 (9.56%)   |
| Carbohydrate metabolic process                       | 150 (10.56%)                          | 88 (8.83%)   | 71 (8.48%)   |
| Cellular component organization                      | 149 (10.49%)                          | 110 (11.03%) | 91 (10.87%)  |
| Secondary metabolic process                          | 147 (10.35%)                          | 119 (11.94%) | 102 (12.19%) |
| Multicellular organismal development                 | 131 (9.23%)                           | 94 (9.43%)   | 73 (8.72%)   |
| Response to biotic stimulus                          | 121 (8.52%)                           | 100 (10.03%) | 78 (9.32%)   |
| Protein metabolic process                            | 114 (8.03%)                           | 73 (7.32%)   | 66 (7.89%)   |
| Generation of precursor metabolites and energy       | 95 (6.69%)                            | 65 (6.52%)   | 50 (5.97%)   |
| Photosynthesis                                       | 82 (5.78%)                            | 57 (5.72%)   | 40 (4.78%)   |
| Reproduction                                         | 73 (5.14%)                            | 50 (5.01%)   | 41 (4.90%)   |

|                                                                       |            |            |            |
|-----------------------------------------------------------------------|------------|------------|------------|
| Response to external stimulus                                         | 73 (5.14%) | 58 (5.82%) | 55 (6.57%) |
| Cell differentiation                                                  | 61 (4.30%) | 51 (5.11%) | 35 (4.18%) |
| Nucleobase, nucleoside, nucleotide and nucleic acid metabolic process | 59 (4.16%) | 41 (4.11%) | 38 (4.54%) |
| Post-embryonic development                                            | 58 (4.09%) | 47 (4.71%) | 37 (4.42%) |
| Anatomical structure morphogenesis                                    | 52 (3.67%) | 39 (3.91%) | 16 (1.91%) |
| Flower development                                                    | 52 (3.67%) | 46 (4.61%) | 35 (4.18%) |
| Cell death                                                            | 47 (3.31%) | 40 (4.01%) | 31 (3.70%) |
| Cell growth                                                           | 42 (2.96%) | 29 (2.91%) | 27 (3.23%) |
| Cell cycle                                                            | 41 (2.89%) | 33 (3.31%) | 28 (3.35%) |
| Embryonic development                                                 | 36 (2.54%) | 17 (1.70%) | 16 (1.91%) |
| Ripening                                                              | 31 (2.18%) | 24 (2.40%) | 7 (0.84%)  |
| Cellular homeostasis                                                  | 25 (1.76%) | 16 (1.60%) | 13 (1.55%) |
| Translation                                                           | 22 (1.55%) | 19 (1.90%) | 14 (1.67%) |
| Response to extracellular stimulus                                    | 20 (1.41%) | 14 (1.40%) | 12 (1.43%) |
| DNA metabolic process                                                 | 17 (1.20%) | 13 (1.30%) | 6 (0.72%)  |
| Tropism                                                               | 16 (1.13%) | 8 (0.80%)  | 6 (0.72%)  |
| Cell communication                                                    | 15 (1.06%) | 12 (1.20%) | 12 (1.43%) |
| Growth                                                                | 14 (0.99%) | 8 (0.80%)  | 5 (0.60%)  |
| Pollination                                                           | 4 (0.28%)  | 1 (0.10%)  | 1 (0.12%)  |
| Behavior                                                              | 3 (0.21%)  | 1 (0.10%)  | 0 (0.00%)  |
| Regulation of gene expression, epigenetic                             | 3 (0.21%)  | 1 (0.10%)  | 2 (0.24%)  |
| Cell-cell signaling                                                   | 2 (0.14%)  | 1 (0.10%)  | 1 (0.12%)  |
| Respiratory electron transport chain                                  | 1 (0.07%)  | 1 (0.10%)  | 1 (0.12%)  |

Table S7: Biochemical pathways and their corresponding genes affected by drought stress in all three genotypes  
Significant difference (FDR <0.05 and fold change  $\geq 2$ ) in relative level is shown in bold.

| Accession no.                  | Annotation                                 | e-value | M82          | IL2-5        | IL9-1         |
|--------------------------------|--------------------------------------------|---------|--------------|--------------|---------------|
| <b>Carotenoid biosynthesis</b> |                                            |         |              |              |               |
| SGN-U212843                    | Phytoene synthase 1, chloroplast precursor | 0       | <b>-2.63</b> | <b>-2.56</b> | <b>-2.50</b>  |
| SGN-U232158                    | Phytoene synthase 1, chloroplast precursor | 7e-010  | <b>-3.00</b> | <b>-2.91</b> | <b>-2.99</b>  |
| SGN-U212844                    | Phytoene synthase 2, chloroplast precursor | 6e-083  | <b>-3.34</b> | <b>-2.16</b> | <b>-2.00</b>  |
| SGN-U212842                    | Mutant phytoene synthase                   | 1e-041  | <b>-2.46</b> | <b>-2.38</b> | -1.94         |
| SGN-U230217                    | Putative phytoene synthase                 | 1e-066  | <b>-3.15</b> | <b>-2.29</b> | <b>-2.30</b>  |
| M84744                         | TOMCBPe Tomato phytoene synthetase         |         | <b>-2.89</b> | <b>-2.71</b> | <b>-2.94</b>  |
| SGN-U221920                    | Lycopene beta-cyclase                      | 1e-155  | <b>-2.11</b> | <b>-2.04</b> | <b>-2.19</b>  |
| Y14809                         | Beta-carotene hydroxylase                  |         | <b>-2.93</b> | <b>-7.17</b> | <b>-6.33</b>  |
| Y14810                         | beta-carotene hydroxylase                  |         | <b>3.02</b>  | <b>2.56</b>  | <b>2.01</b>   |
| SGN-U215829                    | Beta-carotene hydroxylase                  | 1e-160  | <b>-2.65</b> | <b>-7.18</b> | <b>-10.90</b> |
| SGN-U233360                    | Beta-carotene hydroxylase                  | 1e-083  | <b>-3.17</b> | <b>-5.79</b> | <b>-5.92</b>  |

|                                               |                                                                       |        |               |               |               |
|-----------------------------------------------|-----------------------------------------------------------------------|--------|---------------|---------------|---------------|
| SGN-U221254                                   | Zeaxanthin epoxidase                                                  | 1e-123 | -1.32         | <b>-2.27</b>  | <b>-2.27</b>  |
| <b>Nitrogen reduction and fixation</b>        |                                                                       |        |               |               |               |
| SGN-U218881                                   | Nitrate reductase                                                     | 0.0    | <b>-97.10</b> | <b>-24.50</b> | <b>-20.40</b> |
| SGN-U225781                                   | Nitrate reductase                                                     | 1e-156 | <b>-68.50</b> | <b>-19.70</b> | <b>-23.30</b> |
| SGN-U221852                                   | Nitrite reductase                                                     | 2e-080 | <b>-2.16</b>  | <b>-2.27</b>  | <b>-2.07</b>  |
| SGN-U218320                                   | Nitrite reductase                                                     | 0.0    | <b>-9.01</b>  | <b>-4.70</b>  | <b>-5.15</b>  |
| SGN-U215084                                   | Glutamine synthetase GS56                                             | 1e-142 | <b>-14.20</b> | <b>-7.96</b>  | <b>-3.27</b>  |
| SGN-U223400                                   | Aminomethyl transferase                                               | 1e-148 | <b>-2.74</b>  | <b>-2.06</b>  | <b>-2.04</b>  |
| SGN-U217684                                   | Phenylalanine ammonia-lyase                                           | 0.0    | <b>-2.94</b>  | <b>-3.49</b>  | <b>-2.19</b>  |
| SGN-U215486                                   | Asparagine synthetase                                                 | 6e-032 | <b>3.51</b>   | <b>2.17</b>   | 1.38          |
| <b>Lignin biosynthesis</b>                    |                                                                       |        |               |               |               |
| SGN-U217714                                   | 4-coumarate:coenzyme A ligase                                         | 1e-144 | <b>-2.63</b>  | <b>-3.18</b>  | <b>-2.65</b>  |
| SGN-U218477                                   | 4-coumarate-CoA ligase-like protein                                   | 2e-073 | <b>-2.44</b>  | <b>-2.47</b>  | <b>-2.60</b>  |
| SGN-U214174                                   | 4-coumarate--CoA ligase 1 (4CL 1)                                     | 0.0    | <b>-2.81</b>  | <b>-3.86</b>  | <b>-3.09</b>  |
| SGN-U218376                                   | 4-coumarate:coenzyme A ligase                                         | 1e-138 | <b>-2.19</b>  | <b>-2.34</b>  | <b>-2.28</b>  |
| SGN-U231278                                   | 4-coumarate-CoA ligase-like protein                                   | 5e-045 | -1.86         | <b>-2.02</b>  | <b>-2.53</b>  |
| SGN-U215109                                   | O-methyltransferase/S-adenosylmethionin e-dependent methyltransferase | 3e-079 | <b>10.11</b>  | <b>14.06</b>  | <b>16.45</b>  |
| <b>Suberin biosynthesis</b>                   |                                                                       |        |               |               |               |
| SGN-U232238                                   | Phenylalanine ammonia-lyase (EC 4.3.1.5)                              | 6e-097 | <b>-3.83</b>  | <b>-4.14</b>  | <b>-2.78</b>  |
| SGN-U232239                                   | Phenylalanine ammonia-lyase (PAL)                                     | 2e-056 | <b>-5.5</b>   | <b>-4.90</b>  | <b>-3.27</b>  |
| SGN-U217684                                   | Phenylalanine ammonia-lyase                                           | 0.0    | <b>-2.94</b>  | <b>-3.49</b>  | <b>-2.19</b>  |
| SGN-U213271                                   | Cinnamic acid 4-hydroxylase                                           | 3e-052 | <b>-3.37</b>  | <b>-3.25</b>  | <b>-2.93</b>  |
| SGN-U213270                                   | Cinnamic acid 4-hydroxylase                                           | 0.0    | <b>-2.96</b>  | <b>-3.03</b>  | <b>-2.31</b>  |
| SGN-U215381                                   | Putative p-coumaroyl 3'-hydroxylase CYP98A-C1                         | 0.0    | <b>-3.17</b>  | <b>-4.21</b>  | <b>-3.32</b>  |
| SGN-U215109                                   | O-methyltransferase/S-adenosylmethionin e-dependent methyltransferase | 3e-079 | <b>10.11</b>  | <b>14.06</b>  | <b>16.45</b>  |
| <b>polyamine biosynthesis</b>                 |                                                                       |        |               |               |               |
| SGN-U213684                                   | Putative spermine synthase                                            | 0.0    | <b>-2.27</b>  | <b>-2.55</b>  | <b>-2.11</b>  |
| SGN-U213682                                   | Putative spermine synthase                                            | 7e-018 | <b>-2.62</b>  | <b>-2.64</b>  | <b>-2.51</b>  |
| SGN-U213683                                   | Putative spermine synthase                                            | 4e-037 | -1.98         | <b>-2.26</b>  | <b>-2.24</b>  |
| SGN-U232590                                   | Putative spermine synthase                                            | 2e-067 | <b>-2.11</b>  | <b>-2.43</b>  | <b>-2.62</b>  |
| SGN-U213682                                   | Putative spermine synthase                                            | 7e-018 | <b>-2.62</b>  | <b>-2.64</b>  | <b>-2.51</b>  |
| AY335900                                      | Putative spermine synthase (SPM1)                                     |        | -1.53         | <b>-2.24</b>  | -1.89         |
| <b>Sulfate assimilation and dissimilation</b> |                                                                       |        |               |               |               |
| SGN-U213833                                   | Sulfate adenylyltransferase                                           | 0.0    | <b>-7.56</b>  | <b>-4.39</b>  | <b>-5.08</b>  |
| SGN-U225535                                   | Adenylyl-sulfate reductase                                            | 0.0    | <b>-17.10</b> | <b>-4.82</b>  | <b>-6.37</b>  |
| SGN-U240835                                   | Adenylyl-sulfate reductase                                            | 5e-017 | <b>-8.67</b>  | <b>-3.31</b>  | <b>-3.73</b>  |
| SGN-U214793                                   | Cytosolic cysteine synthase                                           | 1e-153 | <b>5.20</b>   | <b>3.45</b>   | <b>3.88</b>   |
| <b>Phenylpropanoid biosynthesis</b>           |                                                                       |        |               |               |               |
| SGN-U232238                                   | Phenylalanine ammonia-lyase (EC 4.3.1.5)                              | 6e-097 | <b>-3.83</b>  | <b>-4.14</b>  | <b>-2.78</b>  |

|                                                           |                                                |        |               |              |               |
|-----------------------------------------------------------|------------------------------------------------|--------|---------------|--------------|---------------|
| SGN-U232239                                               | Phenylalanine ammonia-lyase (PAL)              | 2e-056 | <b>-5.50</b>  | <b>-4.90</b> | <b>-3.27</b>  |
| SGN-U226405                                               | Phenylalanine ammonia-lyase                    | 6e-042 | -1.88         | <b>-2.04</b> | <b>-2.08</b>  |
| SGN-U217684                                               | Phenylalanine ammonia-lyase                    | 0.0    | <b>-2.94</b>  | <b>-3.49</b> | <b>-2.19</b>  |
| SGN-U213271                                               | Cinnamic acid 4-hydroxylase                    | 3e-052 | <b>-3.37</b>  | <b>-3.25</b> | <b>-2.93</b>  |
| SGN-U213270                                               | Cinnamic acid 4-hydroxylase                    | 0.0    | <b>-2.96</b>  | <b>-3.03</b> | <b>-2.31</b>  |
| <b>Glutamate degradation III</b>                          |                                                |        |               |              |               |
| SGN-U212562                                               | Glutamate decarboxylase isozyme 2              | 1e-144 | <b>2.88</b>   | <b>2.44</b>  | 1.90          |
| SGN-U212561                                               | Glutamate decarboxylase isozyme 1              | 0.0    | <b>2.84</b>   | <b>2.77</b>  | <b>2.28</b>   |
| SGN-U212563                                               | Glutamate decarboxylase isozyme 3              | 1e-103 | <b>2.08</b>   | <b>2.14</b>  | 1.87          |
| SGN-U213860                                               | Glutamate decarboxylase                        | 0.0    | <b>10.01</b>  | <b>3.47</b>  | <b>2.14</b>   |
| SGN-U213861                                               | Putative glutamate decarboxylase               | 1e-045 | <b>16.55</b>  | <b>4.71</b>  | <b>2.97</b>   |
| <b>Arginine degradation VI and VII</b>                    |                                                |        |               |              |               |
| AY656837                                                  | Arginase 1 (ARG1)                              |        | <b>2.68</b>   | <b>2.27</b>  | <b>2.23</b>   |
| SGN-U214917                                               | Arginase 1                                     | 0.0    | <b>3.56</b>   | <b>2.03</b>  | <b>2.18</b>   |
| SGN-U216285                                               | Pyrroline-5-carboxylate reductase              | 1e-121 | <b>3.08</b>   | <b>2.65</b>  | <b>2.48</b>   |
| <b>Salicylic acid biosynthesis</b>                        |                                                |        |               |              |               |
| SGN-U232238                                               | Phenylalanine ammonia-lyase (EC 4.3.1.5)       | 6e-097 | <b>-3.83</b>  | <b>-4.14</b> | <b>-2.78</b>  |
| SGN-U232239                                               | Phenylalanine ammonia-lyase (PAL)              | 2e-056 | <b>-5.50</b>  | <b>-4.90</b> | <b>-3.27</b>  |
| SGN-U226405                                               | Phenylalanine ammonia-lyase                    | 6e-042 | -1.88         | <b>-2.04</b> | <b>-2.08</b>  |
| SGN-U217684                                               | Phenylalanine ammonia-lyase                    | 0.0    | <b>-2.94</b>  | <b>-3.49</b> | <b>-2.19</b>  |
| <b>Glycosylglyceride desaturation pathway</b>             |                                                |        |               |              |               |
| SGN-U217678                                               | FAD5 (FATTY ACID DESATURASE 5); oxidoreductase | 1e-150 | <b>-23.40</b> | <b>-9.25</b> | <b>-10.40</b> |
| SGN-U214130                                               | Omega-3 fatty acid desaturase                  | 0.0    | <b>-6.97</b>  | <b>-3.82</b> | <b>-3.65</b>  |
| <b>Canavanine degradation and citrulline biosynthesis</b> |                                                |        |               |              |               |
| AY656837                                                  | Arginase 1 (ARG1)                              |        | <b>2.68</b>   | <b>2.26</b>  | <b>2.23</b>   |
| SGN-U214917                                               | Arginase 1                                     | 0.0    | <b>3.56</b>   | <b>2.03</b>  | <b>2.18</b>   |
| <b>Gibberellin biosynthesis</b>                           |                                                |        |               |              |               |
| SGN-U226448                                               | Gibberellin 20-oxidase-1; 20ox-1               | 0.0    | <b>-15.70</b> | <b>-5.48</b> | <b>-3.55</b>  |
| <b>Formaldehyde assimilation I (serine pathway)</b>       |                                                |        |               |              |               |
| SGN-U237093                                               | Hydroxypyruvate reductase                      | 2e-011 | <b>-2.01</b>  | <b>-2.15</b> | -1.92         |
| SGN-U233374                                               | HPR; oxidoreductase                            | 2e-026 | <b>-2.79</b>  | <b>-2.32</b> | <b>-2.05</b>  |
| SGN-U233373                                               | NADH-dependent hydroxypyruvate reductase       | 7e-055 | <b>-2.41</b>  | <b>-2.41</b> | <b>-2.29</b>  |
| <b>Glycogen biosynthesis II (from UDP-D-Glucose)</b>      |                                                |        |               |              |               |
| SGN-U221404                                               | Starch branching enzyme II, SBE-II             | 2e-058 | <b>2.54</b>   | <b>2.74</b>  | <b>3.19</b>   |
| <b>NAD biosynthesis I (from aspartate)</b>                |                                                |        |               |              |               |
| SGN-U226241                                               | Putative L-aspartate oxidase                   | 5e-077 | <b>-4.32</b>  | <b>-3.17</b> | <b>-2.71</b>  |
| <b>Glycine degradation I</b>                              |                                                |        |               |              |               |
| SGN-U223400                                               | Aminomethyltransferase                         | 1e-148 | <b>-2.74</b>  | <b>-2.06</b> | <b>-2.04</b>  |
| <b>Glycosylglyceride biosynthesis</b>                     |                                                |        |               |              |               |
| SGN-U220224                                               | Digalactosyldiacylglycerol synthase 2          | 1e-044 | <b>-3.41</b>  | <b>-2.46</b> | <b>-2.14</b>  |
| SGN-U226648                                               | Putative UDP-sulfoquinovose synthase           | 1e-058 | <b>3.76</b>   | <b>2.65</b>  | <b>3.04</b>   |

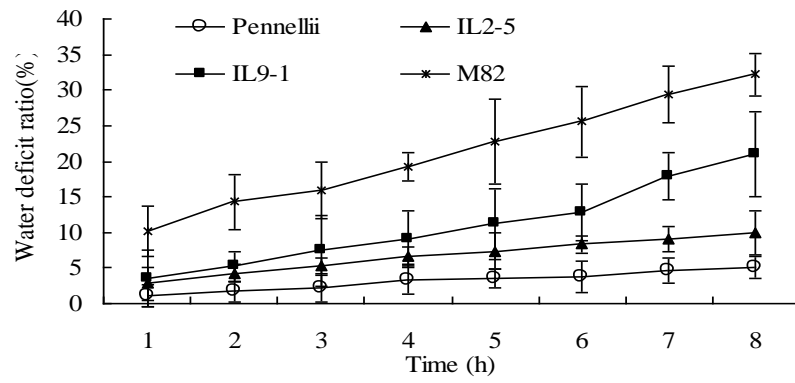

Figure S1: Water deficit ratio of detached leaves of two selected ILs, M82 and *S. pennellii* under 25°C.

Results are means  $\pm$  standard error of triplicate.

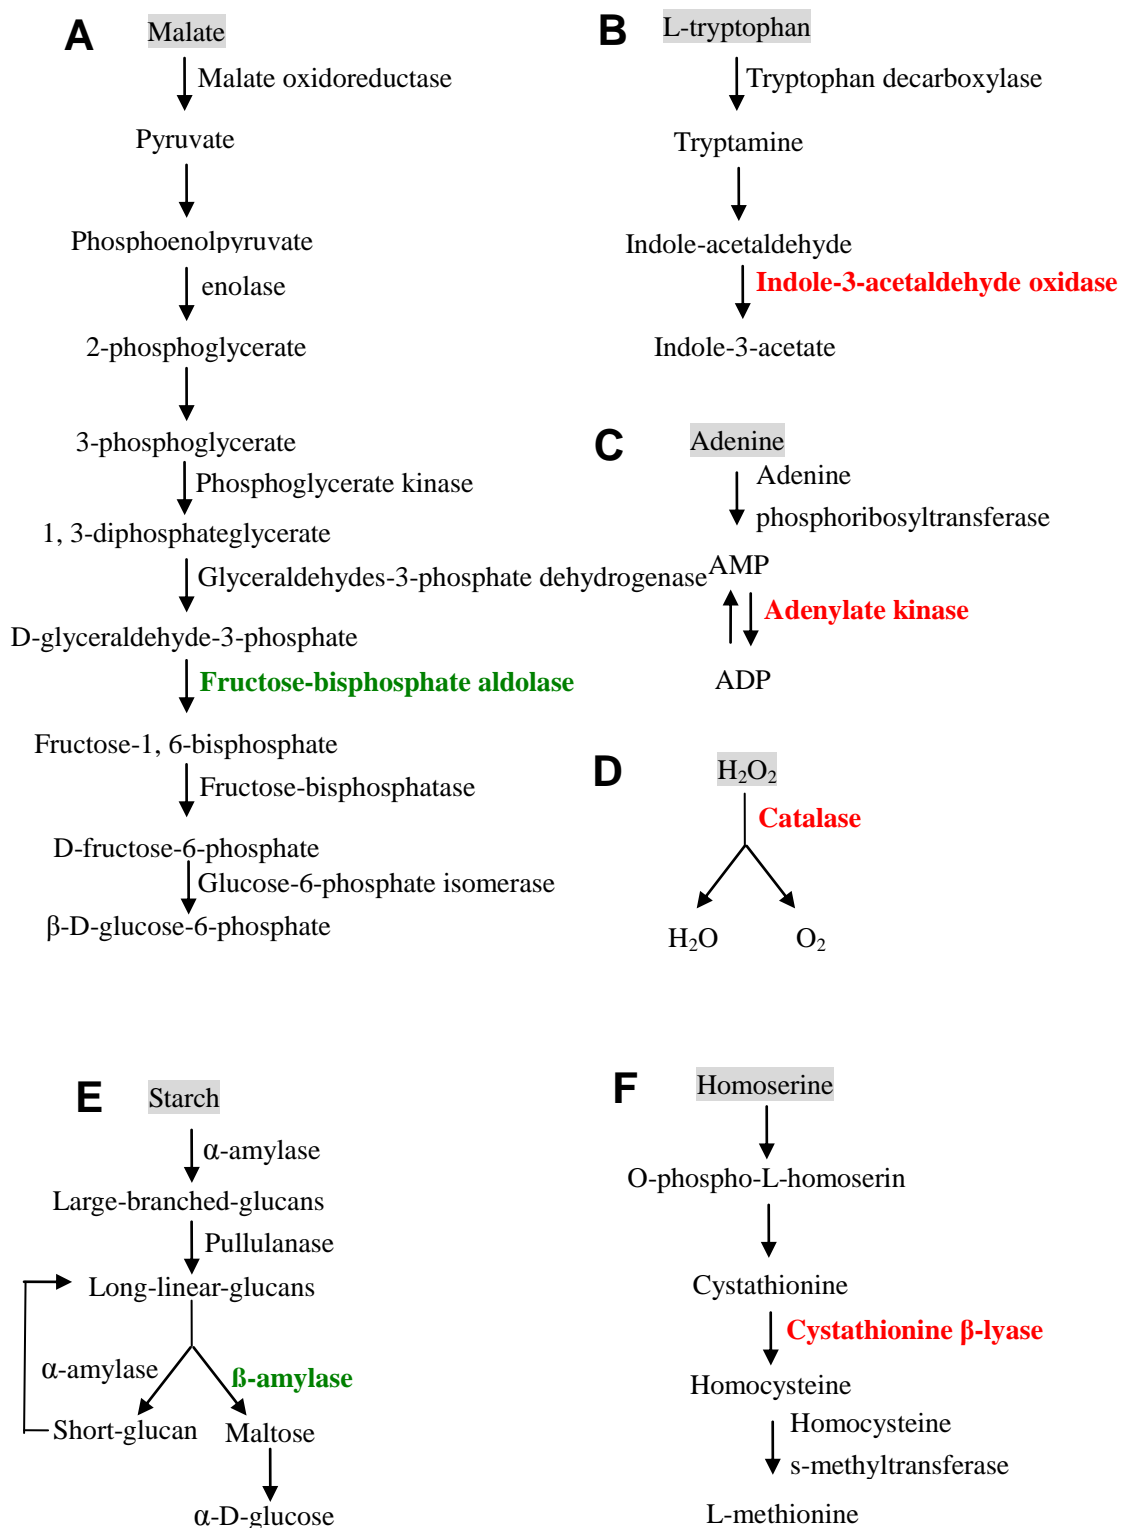

Figure S2: Biochemical pathways affected by drought stress specifically in the tolerant genotypes.

A: Gluconeogenesis; B: Tryptophan degradation; C: Salvage pathways of purine and pyrimidine nucleotides; D: Removal of superoxide radicals; E: Starch degradation, F: Methionine biosynthesis. Enzymes encoded by specifically expressed drought-responsive genes were shown in red (up-regulated) or green (down-regulated).
